# Supplementary figures and images for: Genome-Wide Characterization of High-Affinity Nitrate Transporter 2 (NRT2) Gene Family in Brassica napus
Source: MDPI journal article supplement (doi:10.3390/ijms23094965), 2022-04-29

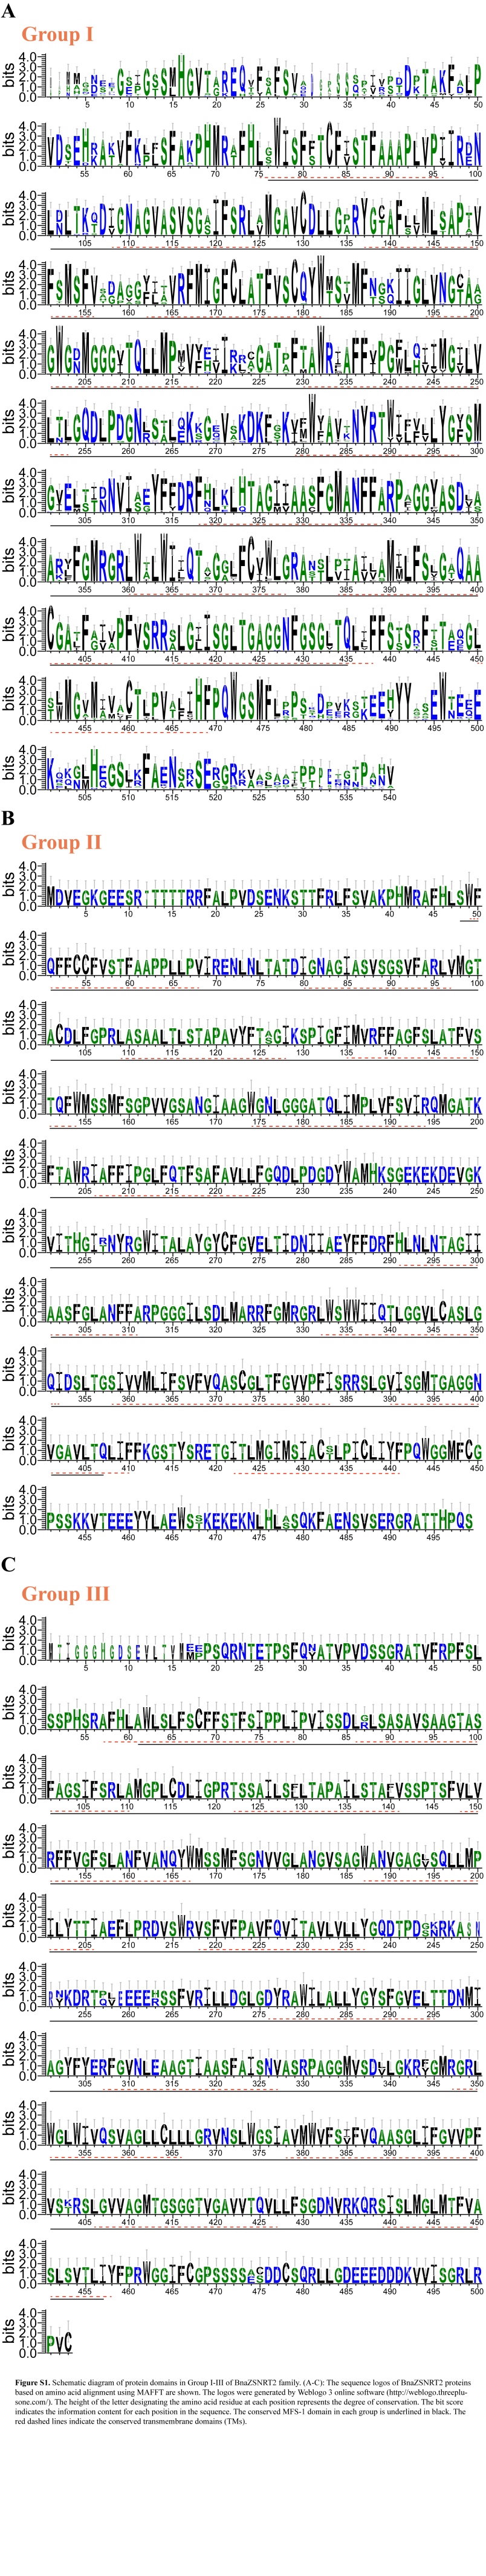

Supplement: s1 [file s1]
